# Supplementary material for: Ontogenetic, dietary, and environmental shifts in Mesosauridae
Source: PeerJ. 2022 Sep 16;10:e13866. doi: 10.7717/peerj.13866 (PMC9484468; doi:10.7717/peerj.13866)
Supplement: Table S1 — Skull, tooth and long bone measurements (mm). [file peerj-10-13866-s001.xlsx]

## Sheet: SuppTable1
Supplementary Table 1. Raw measurements (mm)
	species	facies	size	skull_total_length	skull_antorbital_length	skull_postorbital_length	tooth_length	tooth_diameter	humerus	radius	ulna	mc_I	mc_II	mc_III	mc_IV	mc_V	forelimb_autopod	femur	tibia	fibula	mt_I	mt_II	mt_III	mt_IV	mt_V	hindlimb_autopod
AMNH_FARB_11002	S. tumidum	limestone	5.3	43.9	31.8	7.6			22.6	11.7	11.4	3.5						24.3	15.5	16	6.4	8.8	10.4	11.5	13
AMNH_FARB_11003A	S. tumidum	limestone		58.4	45	7.2	4.3	0.7				5.3	7.4	7.5	7.5
AMNH_FARB_11003B	S. tumidum	limestone	6.6															31.5	19.3	21.5
AMNH_FARB_23792	S. tumidum	siltstone	8.8	58.5	41.8	9			34.2	17.3								33.2
AMNH_FARB_23793	S. tumidum	siltstone	8	63	45.3	8.8	4.1	0.6	34.5	16.5	18.9							37	18.9
AMNH_FARB_23794	S. tumidum	limestone	4	34.6	22.8	6.4			16.8	8.7								15.9	10	9.7	3.5	5.5	7	7.6	8.2	25.9
AMNH_FARB_23795	S. tumidum	limestone	5	39.8	24.9	7.3												23.4	14.8	15.4		7.7	8.6	10.8	11.7	35.8
AMNH_FARB_23796	S. tumidum	limestone	7												8.1	7.2		36.2			9	13.6	15.5	17	18
AMNH_FARB_23797	S. tumidum	NA							22.2	11.8	10.1							28	16.9
AMNH_FARB_23798	S. tumidum	limestone	3.8						16	8.7	8.3
AMNH_FARB_23799	S. tumidum	limestone	3.3	28.5	19.4	4.1	1.8	0.5			6.8							13.8	9.5	9.7	3.5	5.7		6.9	7.9
AMNH_FARB_23800	M. tenuidens	cast	8.7	75.6	50.9	10.9	5.2	0.8
AMNH_FARB_23801	M. tenuidens	cast	9.1	78.5	59.3	11			42.2	20.1	19.5	6.3	7.3	8.1	7.8			40.1	22.1	22.8
AMNH_FARB_23806	M. tenuidens	cast	8						33.1
AMNH_FARB_23807	M. tenuidens	cast	12.4															39.3	22.7	23.7	10.3	13.9	15.5		17.7
AMNH_FARB_23814	M. tenuidens	cast		63.5					34.4	13	12.2	4.9	6	5.8	5.8	5.5		33.1
AMNH_FARB_23821	M. tenuidens	black shale																36.3		23.8	8.8	12.5	14.2	15.3	15.4
AMNH_FARB_23830	M. tenuidens	black shale	9.5															45.9		28.9	10.4	14.4	17.2	18.3	20.6
AMNH_FARB_23831	M. tenuidens	black shale	9.3															36.3	21.2
AMNH_FARB_23833	M. tenuidens	black shale																47.5	26.3	24.8	10.6	14.6	16.7	18.3	19.4
BSPG_1914_I_504	S. tumidum	black shale	6.8															24.8	15.1		6.3	9.6	11.3	12.1	12.5
BSPG_1958_I_360	M. tenuidens	black shale	7.3															31.5			8.5	11.1	13.1	14.5	16
BSPG_1958_I_361	indet	black shale																34.4
BSPG_1959_I_477	M. tenuidens	siltstone	8.1								19.9
BSPG_1959_I_478	M. tenuidens	siltstone
BSPG_1959_I_479	indet	mudstone	10						43.3	19.4	18.6
BSPG_1959_I_480	indet	siltstone	8.7						32.7
BSPG_1959_I_481	indet	siltstone	7.6										6.1	6.1	5.2		18.7	28.4
BSPG_1959_I_482	M. tenuidens	black shale	10.8						45.9	22.4	23.4								26.3
BSPG_1962_I_165	indet	black shale	8.2						34.3									38.1	25.6	24	9.2	12.7	14.1	15.2	15.8
BSPG_1964_I_268	indet	limestone	7.3						34.6	18.9	19.5	6.5						38.1	24.2	24.9	11.1	14.5	17.2	18	19
BSPG_1965_I_130	B. sanpauloensis	mudstone	6.3	41.3	27.2	9.5				13.3	13.2	4.8	6.7	7	6.7	5.6	19.3							10.5	13.4
BSPG_1965_I_131	B. sanpauloensis	mudstone	6.6	42.8	28.4	8.1			26.3									31.4	19.5
BSPG_1966_I_190	S. tumidum	limestone	6.8						33.4	16.7
BSPG_1967_I_11	indet	siltstone	8						30.1	13.7	13.2	5.2	7.3	8	7.3	5.9	21.8
BSPG_1967_I_16	indet	siltstone
BSPG_1972_I_92	M. tenuidens	black shale	6.5						25.4	12.1	12.8							27.3	15	14.3	5.3	8.7	11.1	12.7	11.7
BSPG_1975_I_165	S. tumidum	limestone	7.7	50.4	34.5	8.8			35.7	18.4	20.4	5.3	7.8	7.7	7.4	6.7	25.2	35.4	22.5	24.9	9.3	12.6	14.7	15.4	17.5	50.8
BSPG_1979_I_37	S. tumidum	limestone	2.4	25.9	15.5	4.8	1.8	0.4	12.4	7	6.5							14.2	8.6	8.9	3.1	4.6	5.9	6.7	7.3	20
BSPG_1982_I_27	indet	siltstone	8.5						34									37	23	23.8
BSPG_1997_I_68	S. tumidum	limestone	7.8	59.5	44.2	7.4	3.7	0.5	37.6	18.6		5.9	6.8	8.7	8.8			37.4	22.9	22.6	9.6	13	15.5	16.9	19.5
BSPG_2012_I_15	S. tumidum	limestone	7.4	51.5		7.6	3.6	0.6	33	17	16.5	5.3	7.1	7.6	7.6	6.9	23.8	31.5	24.2
CM_36259	S. tumidum	limestone	8	53.7	34.2	10.4	2.7	0.6	42.5	21.5	21.3							43.1	25.2	27.3	11.1	16.2	18.6	19.7	19.8
CM_41133	S. tumidum	siltstone	3.4	31	21.5	6.1	1.8	0.5	13.7	7.8	7.1	1.9	3	3.5	3.4	2.9		17.1	10.2	9.8	3.2	4.8	5.8	6.1
CM_47529	S. tumidum	siltstone	7.8															36		23.1	9.5	13.8	16.6	17.6	18
CM_79098	S. tumidum	siltstone	8.1	41.1					30.3	17.9	17.2	6.2	8.5	8.4	8.3	7.2	25.2	30.3	16.3
DGM_00155_R	S. tumidum	limestone	10.2	63.4	46	9.2			42.8	24.5	23.4							39.9	25.1	28.6	10.7	14.9	18.5	19.8	21.2	61.8
DGM_00159_R	M. tenuidens	mudstone																41.4	24.4	27	11.8	14.7	15.6	17.7	18.4
GP/2E_0114	S. tumidum	limestone	8.2						34.1	17.1	16.8	5.5	7.4	7.5	7.4	7.2		34.6	20.8	22.8	8.5	11.6	13.7	15.3	16.1
GP/2E_7320	S. tumidum	limestone	7.5						36.8	19.4	19.3	6.1	8.5	8.8	8.4	7.8		37.6	22.2	24.3	10	13.5	16	16.7	18.6
GP/2E_7324	S. tumidum	limestone	3.4	29.7					15	7.5	7	2	3.2	3.4	3.2	3.2		15.7	10.5	10.3	3.8	5.6	6.6	7.3	8	23.7
GP/2E_7326	S. tumidum	limestone	3.3	26.4	18.8	4.4			14.9									15.7	9.4	9.6	3.3	5	6	6.7	7.1	22
GP/2E_7579a	S. tumidum	NA	2.6	22.4					11.8	6	5.6	1.6	2.7	2.8	2.7		7.9	13	8.5	8.4	2.5	4.2	5.3	5.6	6.3	20.4
GP/2E_8150	S. tumidum	limestone	9	61.6	45.8	11.4	4.1	0.8	41	20.9	20.2	6.7						40.5	24.8	26.2	10	14.6	16.4	19.3	21
GP/2E_8151	S. tumidum	limestone	7.6	61.8	43.4	9.7	4.1	0.7	34.3	20.5	20							38	23.1	24.9	8.2	12.8	15.2	16.8	18.5
GP/2E_8153	S. tumidum	limestone	8.3	55.7	39.5	9.3			39.8	20.4	21.2	6.1	9.1	8.9	8.9			35	21.1	21.4	9.4	12.9	15	16.3	18	51.5
GP/2E_8154	S. tumidum	limestone	7.4	59.7	43.6		3.9	0.7	36.4	18.4	19.2							36.7	21.6	24.3	9.1	11.5	13.5
GP/2E_8972	S. tumidum	limestone	8.1	64.6	43.8	11.3			39.9		21.9							40.6	24.7	25.8	10.7	13.4
GP/2E_8975	S. tumidum	siltstone	3.8	33.8	21.1	6			15.6			3.1	4	4.4	4.1	3.5
GP/2E_8976	S. tumidum	siltstone	7						27.5	14.2	13.1	4	5.7	6.3	5.9	5.6	17.6	26.5	17.2	17.7	6.8	9.2	11.3	13.9	14.9	44.7
GP/2E_9230	S. tumidum	siltstone	2.9	27.6	18.9	3.9			12.5	6.3	6.2							13.5	8.4	8.2	2.7	5
GP/2E_9231	S. tumidum	siltstone	4.2	29.5	18	6.3			19	10.6	10	2.7	4	4.3	4.1	3.4	13.8	20.4	12	13.5	4.8	7.3	8.4	9.1	9.9
GP/2E_9233	S. tumidum	siltstone	2.7	24.9	17	4.6	2.2	0.6	11.9									12.8	8	8.1	2.7	4.7	5.5	5.7	6.4
GP/2E_9656b	S. tumidum	limestone	7.5						38.1	20.3	19	5.8	8.4	8.6	7.9	6.5	24.1	37.4	23	25.2	9.7	12.9	15.7	16.2	18.1
GP/2E_9656c	S. tumidum	limestone	8.3															34.4	22.1	21.6	9.7	12.8	14.8	15.9	17.3
GPIT/RE/02073	M. tenuidens	black shale	10.9						52.1	25.8	25.1
GPIT/RE/02075	M. tenuidens	black shale	10.9															43	26.3
GPIT/RE/02121	M. tenuidens	black shale	12.1															35.3	19.7	21.5	7.9	10.7	11.9	12.8	13.7
GPIT/RE/02132	M. tenuidens	black shale	12															41.6
GPIT/RE/02136	M. tenuidens	black shale	9.5						34									30.3	22.4	22.9
GPIT/RE/02140	indet	black shale	12.5															49.2		33
GPIT/RE/02155	M. tenuidens	black shale	9.9						33.1	14.7	13.7	6.2
GPIT/RE/02161	indet	black shale	8.7						40.8
GPIT/RE/02162	M. tenuidens	black shale	8.4															29.3	18.1	19.6	7.5	10.1	11.3	11.7	12.6
GPIT/RE/02165	indet	black shale	9.1						40	19.4	18.6
GPIT/RE/02168	indet	black shale																45.3	24.6	26.2	11.3	15.3	16.5	15.6	18.2
GPIT/RE/02169	M. tenuidens	black shale	5.9															18.4	10.4	11.4	4.9	6.3	7.3	7.9	8.5
GPIT/RE/02171	M. tenuidens	black shale	9.1						34.6	18	16.5	5.5	6.8	7.4	7.2	6.2
GPIT/RE/02172	M. tenuidens	black shale	8.9						38.5	20.6	18.7	7.7	9.3	9.3	9.1	8.9
GPIT/RE/02173	indet	black shale	8.8															23.7	14.2	12.5
GPIT/RE/02174	M. tenuidens	black shale	10.1						46.6		23.2							48.5	26.7	29
GPIT/RE/02176	M. tenuidens	black shale	8.9						31.5									32.1		20.8
GPIT/RE/02180	M. tenuidens	black shale	8.2							13.5	12.7							34.4
GPIT/RE/02183	M. tenuidens	black shale	11.3						49.9
GPIT/RE/02195	M. tenuidens	black shale	7.1						23.8
GPIT/RE/02198	M. tenuidens	black shale	8.5	85.2			8.9	0.6	34.2	18.1	15.2	6.7	8.3	8.9	7.9	7.8
GPIT/RE/02217	M. tenuidens	black shale	9.5															37.9	21.5	24.2	10.7
GPIT/RE/02220	M. tenuidens	black shale	6.3						19.6	10.4	8.9	3.2	4.1	4.2	4.5	3.5	15.1
GPIT/RE/02252	indet	siltstone	6.9						30.5										19	19	8.9	11.3	14.3	15.2	15.7
GPIT/RE/02272	M. tenuidens	black shale	6.1						16.7	7.7	7.2			4.5	4.4	4		17.9
GPIT/RE/02277	M. tenuidens	black shale	6.7						20.5	10.3	9.5	3.3	4.5	4.5	4.8	3.7	14.8
GPIT/RE/07332	S. tumidum	limestone	8.7	62.5	40.8	12.8	3.9	0.4	35.7	19.1	19.2							35.7	22.9	22.2	9.7	12.8	15	16.1	17.7	47.7
MB.R.2089.A	S. tumidum	limestone	7.7						37.1	20.1	18.8	7	8.6	9	8.7	7.8	29.1	38.8	24.8	26.6	10.1	13.5	16.3	17.7	20.2
MB.R.2089.B	S. tumidum	limestone
MB.R.2897	indet	limestone	7.5	55	33.6	14.8	2.8	0.4	33.1	20.9	20.7							40.3	29.8	25.7
MB.R.3254	S. tumidum	limestone	6.4	49.4	33.8	10.8	4.9	0.7	23.8	12	12.2							24.4	15.4	15.5	6.6	9.5	11.1	12	13.6
MB.R.5605	S. tumidum	limestone	8	60.2	43.4	8.9			38.1	18.9	18.6							37.4	21.8	18	10.5	14.1	19.3	18	19.4	53.8
MB.R.5606/5607	S. tumidum	limestone	2.8	28.4	17.5	6.9	1.8	0.4	12.4	6.4	6	1.8	3	3.3	3.1	2.3	9.5	13.9	8.8	8.2	3.3	4.7	5.4	5.6	6.6	17.3
MCZ_3373	M. tenuidens	mudstone	5.8	52.9	45.6	6.5	2.4	0.4										23.6	14.6
MCZ_4028	M. tenuidens	black shale	6.4	57.7			7.3	0.6
MCZ_4029	M. tenuidens	black shale	9.1	120.9	95.5	12.7	11	0.9
MCZ_4032	M. tenuidens	black shale		102.4	84	9.8	11.7	1
MCZ_4033_02	M. tenuidens	black shale	10.1															30.6	17.7	19.4	8.4	11.7	12.7	13.1	13.6
MCZ_4033_04	M. tenuidens	black shale	11.7															42.4	22.9	22.9
MCZ_4033_05	M. tenuidens	black shale	9.4									5.4	6.7	6.7	6.3	5.9	22.1
MCZ_4033_08A	M. tenuidens	black shale	7.1	62.9	44.4	10.4	9.7	1
MCZ_4033_09	M. tenuidens	black shale	11															40.7	23	26.4
MCZ_4033_10	M. tenuidens	black shale																			10.2	14.2	16.1	17.1	18.9
MCZ_4033_B	M. tenuidens	black shale							40.4		19.1
MNRJ_2202V	M. tenuidens	mudstone	7.7	55.9	38.6	10.4	7.2	0.4	37.1
MZSP-PV_1301	S. tumidum	limestone	2.8	24.3	15	4.4	2.8	0.7	12.8	6.9	6.3							14.5	9.4	9	3.8	4.9	5.7	6	6.7	21.1
MZSP-PV_1303	S. tumidum	limestone	5.4	49.8	35.5	7.7			26.1	13.9	12.8	4.2	5.8	6.1	5.8	4.7	20.7	26.6	17.4	17	7	10	11.7	12.8	13.8	36.1
MZSP-PV_1313	S. tumidum	limestone	3.2	77.4	58.2	11.3	5.8	0.9										17	10.8	11.3	4.1	6.4	7.5	8	8.4	27.7
MZSP-PV_1314	S. tumidum	limestone	7.8	57.9	38.5	10			38.3									39.1	24.2	26.2	10	13.6	16.5	17.4	19.7	51.9
NHMW_1965_0630_0001	M. tenuidens	black shale	8.5	69.7	48.6	11.6	8.8	0.9
NHMW_1966_0687_0001	S. tumidum	limestone	6.6						32.2	14.5
NHMW_1972_1511_0001	S. tumidum	limestone	6.7	56.5	37.8	10.7												29.5	17.8	18.1	8	10.6	13	14.3	15.1
NHMW_1977_1881_0001	indet	limestone	7.3															38.6	23.2	22.1	9	12.9	15.3	16.6	18.3
NHMW_1977_1872_0001	S. tumidum	limestone	7.7	60.6	42.6	11.9	3.7	0.9	37.4	18.9	18.3	6.4	8.7	8.9	8.3	7.6	28.7
NHMW_1987_0066_0001	S. tumidum	limestone	8	62.5	44.1	13.1	4.9	0.9	36.4	14	18.8							37.1	23.2	23.6	10.1	14.9	17.4	17.9	19
NHMW_1987_0067_0001	S. tumidum	limestone	6	52.5	38.9	6.5	3.3	0.7	27.6	14.2	13.2	4.3	6.5	6.6	6.3	6.5		28.5	17.3	17.9	7	10	12.2	13.4	14.3	40.2
NHMW_1987_0068_0001	S. tumidum	limestone	3.1	30.4	18.7	6.5			14.2	8.1	7.2							15.9	10.1	10.3	3.4	5.3	6.3	6.6	7.6	24.7
NHMW_1987_0069_0001	S. tumidum	limestone	3.1	27	16	5.8			13.6	7.2	5.5							15	9	8.8	3.4	4.9	5.9	6.5	7
NMHS_21867	B. sanpauloensis	siltstone	6.7	38.7	25.7	6.9			25.8	14.5	13.5
NRM_PZ_R_1747	S. tumidum	limestone	8.3	54		9.2	4.3	0.9	32.5	16.5	15.3	5.6	8	8.4	7.9	6.9	27.7	32.2	20	18.3	9	12.5	15.5	16.9	18	55.9
NRM_PZ_R_188	M. tenuidens	black shale	9.5															41.6	24	27.1	10.7	14.4	16.4	17.8	18.8
NRM_PZ_R_190	M. tenuidens	black shale	6.6	57.3			9.2	0.5	23.8	12.4	13.2	3.7	5.4	5.1
NRM_PZ_R_195	M. tenuidens	black shale							36.9	19.5	19.3	6	8.4	9.3	8.3	7.9	24.4
NRM_PZ_R_202	M. tenuidens	black shale
NRM_PZ_R_204	M. tenuidens	black shale	10.4															40	23.8	24.6	10.4	14.6	16.2	17.1	18.9	64.5
NRM_PZ_R_205	M. tenuidens	black shale	7	53.5	41	6.23	6.3	0.5	21.9
NRM_PZ_R_207_a	M. tenuidens	black shale		82.5	62.7	12	8.8	1
NRM_PZ_R_207_b	M. tenuidens	black shale				11.7
NRM_PZ_R_207_c	M. tenuidens	black shale	12.2	100.5	81.8	14	10.9	1.2		21.7	21.9							44.4	25.6	25.4	10.3	14.7	16.1	16.9
NRM_PZ_R_208	M. tenuidens	black shale	8.8	79.1	59.1	8	8.4	1
NRM_PZ_R_209_a	M. tenuidens	black shale	8.5	79.5	61.3	8.7	11.4	0.9	32.6
NRM_PZ_R_210	M. tenuidens	black shale		78.7	58.9	8	6.5	0.7
NRM_PZ_R_234	M. tenuidens	black shale																35.7	22	20	10	13	14.2	16.2	17
NRM_PZ_R_236	M. tenuidens	black shale																23.2	16.1	16.4	7.6	10	11	12
NRM_PZ_R_244	M. tenuidens	black shale																36.3	19.8	21.5	8.8	10.7	12.5	13.3	14
NRM_PZ_R_246	M. tenuidens	black shale	2.97															10.7	6.2	6.1	2.9	4	4.6	5.2	5.7
NRM_PZ_R_250	M. tenuidens	black shale																41.7	25.3	25.2
NRM_PZ_R_261	M. tenuidens	black shale							48.6	23.1	24.1
NRM_PZ_R_277	M. tenuidens	black shale																50.9		31.3
NRM_PZ_R_297	M. tenuidens	black shale							23.1	10.5	12.8	3.9	5.5	6.7	5.6
NRM_PZ_R_311	M. tenuidens	black shale																46.7
NRM_PZ_R_312	M. tenuidens	black shale																42	28.5	24	12.7	16.5	19	20.2	21.2
NRM_PZ_R_325	M. tenuidens	black shale	10.6															53.5	28.8	31.4
NRM_PZ_R_336	M. tenuidens	black shale																44.9	24.2	23.2	10.9	12.4	15.8	17	17.9
NRM_PZ_R_338	M. tenuidens	black shale																	25.8	27	13	17.6	19	19.3	21
NRM_PZ_R_344	M. tenuidens	black shale							36.3			6.8	8	7.5	6.6
NRM_PZ_R_345	M. tenuidens	black shale																	23.7		9.9	11.9	14.4	15.7
NRM_PZ_R_346	M. tenuidens	black shale																	20	19.4	8.7	11.2	12.3	12.8	13.3
NRM_PZ_R_350	M. tenuidens	black shale	10.4															45.5	26.9	26.4	10.4	13.6	15.7	16.7	17.6
NRM_PZ_R_353	M. tenuidens	black shale																			10.6	14	15.8	16.2	17.1
NRM_PZ_R_386	M. tenuidens	black shale																35.1	20.7	20.7	8.5	12.4	14.3	16.1	16.6
NRM_PZ_R_392	M. tenuidens	black shale							28.7	13.8	13.3
NRM_PZ_R_393	M. tenuidens	black shale							42.8	21.5	21.9
NRM_PZ_R_404	M. tenuidens	black shale	8.4						43.7	19.8	19.2	5.6	7.7	8.2
NRM_PZ_R_406	M. tenuidens	black shale	9.2						40.6	19.4	18.9	5.6	8	7.9	7.2	6.2
NRM_PZ_R_414	M. tenuidens	black shale	9.4															31.7	17.4	18.6	8.6	11.3	12.9	13.4	14
NRM_PZ_R_418	M. tenuidens	black shale	7						21.9	12.1		3.8	5	5.2	4.8	4.3
NRM_PZ_R_453	M. tenuidens	black shale	10.3															48.3	26.6	29	11.3	15.6	18.7	20	20.7	67.6
NRM_PZ_R_547	M. tenuidens	black shale	9.4															32	19.7	18.5	10.1	11.8	13.5	14.4	14.9
NRM_PZ_R_637	M. tenuidens	black shale																	25.1		10.3	14	16.9	18.1	18.5
NRM_PZ_R_639	M. tenuidens	black shale	9.2							19.6	18.1	6.1	8.4	8	7.5	6.3	24.7
NRM_PZ_R_642	M. tenuidens	black shale							38.1	19.3	19.3	6.4	8.6	8.5
NRM_PZ_R_652	M. tenuidens	black shale																45.3	28.3	28.7	8.6	11.7
PIMUZ_A/III_012	indet	cast
PIMUZ_A/III_026	indet	siltstone	9						31.9	19.3	18.4	6.6		9.9
PIMUZ_A/III_192	B. sanpauloensis	black shale	7.3	41.6	27.4	7.7			28	14.1	15.3							30.8	18.1	15.9	8.7	9.9	12.1	13.6	15.3
PIMUZ_A/III_513	B. sanpauloensis	siltstone	6.9	43	29.1	6.3			29.4
PIMUZ_A/III_591	S. tumidum	limestone	5.7	47.6	34.9	6.7	2.6	0.6	22.2	13.5	12.6	4.2	6.5	6.5	6.1	5.7	18.3	25.7	16.4	16.6	6.6	9.3	10.9	12.4	13.5
PIMUZ_A/III_801	S. tumidum	limestone	8.3						36.5									35.5		24.6
ROM_01108	M. tenuidens	black shale	10.5															45.3	26.8
ROM_05064_B	S. tumidum	siltstone	5.7						26.9	18.7	15.3
ROM_05064_C	S. tumidum	siltstone							24.9	12.2	12.6	3.7	5.6	5.6	5.8	5.3
ROM_05064_E	S. tumidum	siltstone																28.4
ROM_23276	M. tenuidens	mudstone	10.7	83.2	64.7	8.1	11.4	1.5	39.1
ROM_28496	B. sanpauloensis	siltstone	6.4	40.3	27.3	7.2	1.9	0.3	24.6	12.9	11.8	4.1	5.8	6	5.8	4.9	18.1
ROM_28497	S. tumidum	NA																37.4	20.4	24.1	8	11.2	13.5	15.1	16.9
ROM_44615	M. tenuidens	NA		74.8					27.2	14.8	13.8	5.1	6.6					28.7	16.9	17.8	7.7		12.2	12.7	13.2
ROM_L_78867	S. tumidum	limestone	7.8	59.8					36.3	17.8								33.8	20.3	21.7	8	11.5	13.5	15.5	16.7
SMF-R-386	indet	cast	8.9	74.3	49.7	14.9
SMF-R-387	M. tenuidens	cast	8.9	79.9	56.7	13.7	8.3	0.7	39.2	20.9	19.3	6.6	7.3	8.3	8.3			40.1	21.4	21.7
SMF-R-4236	indet	siltstone	8.4															36	20.8			11.6	13.7	15.1	16.7
SMF-R-4470	S. tumidum	calcarenite	6.9															33	20.4	22.5	8.6	11.9	13.8	14.5	15.7	48.5
SMF-R-4471	S. tumidum	siltstone	6.2															37	24	26.4	9.5	13.4	15.8	17.1	18.2	53.4
SMF-R-4472	indet	calcarenite	9																	27.9
SMF-R-4473	S. tumidum	calcarenite	6.6						32.8
SMF-R-4474	indet	calcarenite	7.8							20.8
SMF-R-4475	indet	calcarenite	7.9
SMF-R-4476	S. tumidum	calcarenite	7.4															32.1	18.6	21.1			13.1
SMF-R-4477	indet	calcarenite	7.9															39.6	22.2		9.9	14.3	16.9	17.1
SMF-R-4478	S. tumidum	calcarenite	8.3						36.8	18.3	19.3							37.7	22.6	23.7	9.1	12.9	15.4	16.7	18.8
SMF-R-4479	indet	calcarenite	8.4
SMF-R-4480	S. tumidum	calcarenite	7.9
SMF-R-4481	indet	calcarenite	8.4
SMF-R-4482	indet	calcarenite	7.1															35.3					17.3	16.2
SMF-R-4483	indet	calcarenite	6.1
SMF-R-4484	indet	calcarenite	7.9						36.2	18.6	18.2
SMF-R-4485	indet	calcarenite	5.3						23	11.8		3.9	5.6	5.7	5.5	5	19.6
SMF-R-4486	indet	calcarenite	8.5						34.9
SMF-R-4487	S. tumidum	calcarenite	8.4																23.7
SMF-R-4488	indet	calcarenite	9.2															36.4		24.6
SMF-R-4489	indet	calcarenite	9															32.8					13.4	14.7	16.8
SMF-R-4490	M. tenuidens	limestone	5.5															23.7	14.6		5.7	8.2	9.3	10.1	10.7
SMF-R-4491	indet	calcarenite	7.5
SMF-R-4492	indet	calcarenite	6.2							15.3	14.5	5.3	7.6	7.7	7.2	6.1	22.2
SMF-R-4493	indet	calcarenite	7.8															39.1
SMF-R-4494	S. tumidum	calcarenite
SMF-R-4495	indet	calcarenite	9.3															37.5
SMF-R-4496	indet	calcarenite	7
SMF-R-4497	S. tumidum	calcarenite	7.5															32.2
SMF-R-4498	indet	calcarenite	7.8						30.5
SMF-R-4499	indet	siltstone	8.1
SMF-R-4512	S. tumidum	limestone	3.5	27.5	18.1	3.5	2.4	0.7	12.6	7.8	7.2	2.4	3.5	3.6	3.5			12.8			3.8	6.4	6.9		8.1
SMF-R-4513a	S. tumidum	limestone	3.2	25.3					15.8	8.8	7.8	2.6	3.3	3.8	3.8	3.4	12.6	16.4	10	10	4	5.7	6.6	7.3	8.2	22.8
SMF-R-4513b	S. tumidum	limestone	6.8						26.5	17.7								27.3	17.6		8	11.3	13.3	13.8	15.7
SMF-R-4528	S. tumidum	calcarenite	7.8	60.9	44.3	7.1			36	19.8	19.3	6.5	8.5	8.7	8.2	7.8	27.7	38	22	23.5	9.8	12.5	15.4	16.2	18.7	54.6
SMF-R-4710	S. tumidum	limestone	8	67	43.3	12.4	4.5	0.8	38	19.7	18.3	6.1	8.4	9.1	8.5	6.9	28	38.6	23.2	20.4	9.2	12.7	15.5	17.6	18.2	48.2
SMF-R-4712	M. tenuidens	black shale	8	59.7	44.4	7.9												34.5	19.6	21.9	8.8	10.9	13.3	14.8
SMF-R-4921	M. tenuidens	cast	6.6	46.8	27.4	9.9	5.6	0.7	19.1	10.6	10.3
SMF-R-4934	indet	siltstone	6.1	48.4	35.6	6.7	4.2	0.5	23.4	12	12.1	3.5	6.1	6.1	5.4	4.4		26.3	15.6	16.7	6.6	9.3	11.3	12.4	13.2
SMF-R-4935	S. tumidum	limestone	8						38.5	18.9	19.5							37.3	20.2	24.8	8.3	12.7	14.5	15.9	17.2
SMF-R-5046	indet	calcarenite	7.5
SMF-R-5047	indet	siltstone	8.3	59.3	42.9	9.5			32.8	19.4	18.8	6.7	8.9					30.4	21.7	22.9	9.5		12.5
SMF-R-5048	M. tenuidens	mudstone	8.2
SMNK-PAL_3806	S. tumidum	limestone	6.8	60.8	42.9	8.8			33.6	18.3	17.2							34.4	21.9		9.5	12.5	14.8	16.3	17.8	43.4
SMNK-PAL_3807	S. tumidum	limestone	7.3	55.7	40.8	5.9			36.3	15.1	14.7							35.8	21.5	18.6
SMNK-PAL_3808	S. tumidum	limestone	7.8	61.6	42.5	9.2			38.9	18.3	18.5	5.7	8.5	9.3	9	5.8	27.3	34.5	23.4	24	10.1	13.3	16.1	16.9	18.8	57.7
SMNK-PAL_76/1	indet	siltstone	8.3															36.1		23.7
SMNK-PAL_9165	S. tumidum	limestone	6.7	58	39.8	10.4	3.4	0.6	30.1	16.2	15.5	5.3	7.6	7.7	7.6		23.4	32.4	19.4	19.8	8.7	11.9	14.2	15.6	16.8
SMNK-PAL_pu_533	M. tenuidens	limestone	4.2	33.8	21.1	8			18.1									19.9	12.5		4.8	6.8	8.7	9.4	10.4	29.9
SMNS_51560	B. sanpauloensis	mudstone	8	38.4	23.8	8.9			30.1	16	15.8	5.2	7.4	7.8	7.5	6.5	22	31.7	19.9	17.9	8	11	14.1	15.1	15.8	42.8
SMNS_51855	indet	siltstone	8.3															32.6	19.4	20.7
SMNS_54937	S. tumidum	limestone	6.1						24.2									24.5	16.4	15.4
SMNS_80732	S. tumidum	limestone	7.6															35.1	22.6
SMNS_80733	S. tumidum	mudstone	7.3	58.9	43.2	8.5												35.9	22.1				14.1	15.6	17.1
SMNS_81714	S. tumidum	calcarenite	5.8	40.8	27.1	7.5			23.1	12.5	12.5							24.6	16.8	16.5	6.8	9.8	12	13.2	14	45.7
UFRGS-PV_0192_P	B. sanpauloensis	mudstone	8.4	53.7	36.5	8.3			32.3	17.3	16.3	5.8	8.2	8.3	8	6.7	24.6	33.4	21.1	18.9	8.7	12.9	14.9	16	16.8	47.6
UFRGS-PV_0373_P	M. tenuidens	black shale	8.7						32.4	17.1	15.2	5.8	8.7					33.7	19.5	21	9.5	11.3	13.4	15.2	16.1
UFRGS-PV_0379_P	S. tumidum	siltstone	7	57.6	41.4	8.1			31.6	16.7								32.2	20.2	20.4	8.5	12.9	14	15.1	16
UFRGS-PV_0533_P	M. tenuidens	black shale	11.3															49.4	31.5	37.6	12.4	16.3	19.1	22	24.1
UFRGS-PV_0540_P	B. sanpauloensis	siltstone	6.4	41.6	26.8	6			26.4	14.9	14.2	5.3	5.8	6.6	6.4	4.6		29.8
UFRGS-PV_0541_P	B. sanpauloensis	siltstone	7.6	47	30.9	7.1			29.4	14.7	14.5							30.6	19.8	20.1	8.5	10.9	13.4	14.6	15.8
UFSCar_RE_014	B. sanpauloensis	mudstone	8.2															32	18.6	21.5
UFSCar_RE_169	B. sanpauloensis	mudstone	6.6						28	15.1								29.2	18.6	18.3
UFSCar_RE_26	B. sanpauloensis	mudstone	5.6															25.6	16.2	14.6	6.2	8.6	10.8	11.4	12.7
URCR.152	S. tumidum	limestone	6.1	49	35.8	5.6	3	0.6	25.4		13.3							26	16.4	17.3	7.1	10	12.1	13.6	14.5	45.5
URCR.155	S. tumidum	calcarenite	6.2	57.2	42	7	3.4	0.7	26	14.7	13.6	4.9	6.8	7.3	7.5	6		27.4	17.3	16.8	7.7	10.8	12.8	13.9	14.9	22.8
URCR.156a	S. tumidum	limestone	6.4	49.9	36.3	6.9	4	0.7	27.2									28.8	17.5	18.2	7.1	10.2	11.2	12.6	14.2
URCR.156b	S. tumidum	limestone	7.2	59.7			4.5	0.8	34.2									33	21.5	22.7	8.9
URCR.159a	S. tumidum	limestone	3.5	30	19.7	4.1	1.5	0.5	15.8	8	8.3	1.9	3.7	4	3.9	3		17.3	10.4	10.4	4.1	6.1	6.8	7.3	7.9
URCR.159b	S. tumidum	limestone	5.3	46.5	33	6.4			25.2	13.2	12.9	4.4	6.2	6.4	6.1	4.5	19.3	26.5	14.9	17.1	6.5	9.8	10.9	11.7	12.9
URCR.64a	S. tumidum	limestone	3.8	30.7	20	5.4	1.7	0.7	16	7.5	8							16.2	9.8	10.7	3.9	5.8	6.7	7.8	8	24.8
USNM_PAL_25850	M. tenuidens	siltstone	6.3						25
USNM_PAL_25851	M. tenuidens	NA							43.4	19.4
USNM_PAL_25853	M. tenuidens	black shale	10.5															42.4	23.4		11.7	14.4	17.3	18	20
USNM_PAL_25854	M. tenuidens	black shale							39.4	19	18.8	6.9	8.3	8.6	8.1	7.5		37.9	24.4	22.2
USNM_PAL_25855	M. tenuidens	black shale	9						43.2
USNM_PAL_25856	M. tenuidens	black shale	8.7															33.4	18.1	19	8.9	11.4	12.6	13.8
USNM_PAL_25858	M. tenuidens	black shale	9.7						34.4		19.9							34.4	19.9	18.6
USNM_PAL_25859	M. tenuidens	black shale	8.1						37.4	19.9	19.5	6.2	8.1	8.2	7.5	6.8	25.9
USNM_PAL_25864	M. tenuidens	black shale	10.2						42.4	19.7								41.3	22.4	24.9
USNM_PAL_412494_1	M. tenuidens	black shale	9.1						38									34.1	21.8	23.3
USNM_PAL_8301	M. tenuidens	black shale																26.8	15.3	15.8
V2856	S. tumidum	limestone	6.4						26	13.7	12.5	4						28.5	16.7	17.6	6.7	9.7	11.3	12.4	13.5	42
V3571	M. tenuidens	siltstone	8.1						25.4	12.5	12.3	5.9	6.8	6.9	6.3	5.7	19.4	26.5	15.4	16
V3573	M. tenuidens	siltstone	8.1	62.4	44.7	8.9	5.5	0.9	25.9	14	12.3	4.6	5.1	5.8	5.8	5.4	19
